# Supplementary material
Source: publisher figshare collection journal article supplement (https://asha.figshare.com/articles/dataset/_/20669712)
Supplement: Supplementary file 1 [file 1]

**Supplemental Material S2.** Descriptive statistics for quantitative videofluoroscopic measures by barium stimulus.

| <u>Parameter</u>                             | <u>Stimulus</u>      | <u>Mean</u> | <u>Standard<br/>Deviation</u> | <u>Minimum</u> | <u>1st<br/>Quartile</u> | <u>Median</u> | <u>3rd<br/>Quartile</u> | <u>Maximum</u> |
|----------------------------------------------|----------------------|-------------|-------------------------------|----------------|-------------------------|---------------|-------------------------|----------------|
| Swallow Reaction<br>Time (ms)                | 20%w/v E-Z-HD™       | 59          | 85                            | -33            | 8                       | 33            | 108                     | 300            |
|                                              | 20%w/v Polibar Plus® | 146         | 301                           | -33            | 17                      | 50            | 117                     | 1234           |
|                                              | 20%w/v E-Z-Paque®    | 111         | 194                           | -50            | -4                      | 42            | 142                     | 634            |
|                                              | 40%w/v Polibar Plus® | 94          | 177                           | -50            | 0                       | 33            | 125                     | 751            |
|                                              | 40%w/v E-Z-Paque®    | 109         | 152                           | -17            | 21                      | 50            | 146                     | 534            |
| Hyoid-Burst-to-UES-<br>Opening Interval (ms) | 20%w/v E-Z-HD™       | 103         | 28                            | 67             | 83                      | 100           | 117                     | 183            |
|                                              | 20%w/v Polibar Plus® | 86          | 54                            | -117           | 67                      | 100           | 117                     | 150            |
|                                              | 20%w/v E-Z-Paque®    | 93          | 45                            | -50            | 83                      | 100           | 117                     | 183            |
|                                              | 40%w/v Polibar Plus® | 99          | 26                            | 50             | 83                      | 100           | 117                     | 150            |
|                                              | 40%w/v E-Z-Paque®    | 99          | 28                            | 67             | 67                      | 100           | 129                     | 150            |

|                           |                      |     |     |     |     |     |     |     |
|---------------------------|----------------------|-----|-----|-----|-----|-----|-----|-----|
| UES Opening Duration (ms) | 20%w/v E-Z-HD™       | 482 | 71  | 334 | 434 | 484 | 534 | 601 |
|                           | 20%w/v Polibar Plus® | 547 | 84  | 334 | 484 | 567 | 617 | 667 |
|                           | 20%w/v E-Z-Paque®    | 564 | 59  | 484 | 517 | 567 | 596 | 667 |
|                           | 40%w/v Polibar Plus® | 580 | 63  | 450 | 521 | 584 | 617 | 717 |
|                           | 40%w/v E-Z-Paque®    | 585 | 74  | 400 | 550 | 584 | 630 | 701 |
| Time-to-LVC (ms)          | 20%w/v E-Z-HD™       | 132 | 59  | 33  | 92  | 125 | 171 | 267 |
|                           | 20%w/v Polibar Plus® | 131 | 54  | 50  | 100 | 117 | 167 | 267 |
|                           | 20%w/v E-Z-Paque®    | 134 | 68  | 50  | 79  | 133 | 154 | 350 |
|                           | 40%w/v Polibar Plus® | 145 | 72  | 50  | 88  | 117 | 200 | 317 |
|                           | 40%w/v E-Z-Paque®    | 142 | 79  | 33  | 88  | 125 | 204 | 367 |
| LVC Duration (ms)         | 20%w/v E-Z-HD™       | 550 | 135 | 367 | 467 | 517 | 605 | 967 |
|                           | 20%w/v Polibar Plus® | 515 | 111 | 350 | 400 | 517 | 584 | 767 |
|                           | 20%w/v E-Z-Paque®    | 533 | 129 | 350 | 450 | 517 | 617 | 901 |
|                           | 40%w/v Polibar Plus® | 531 | 122 | 384 | 438 | 525 | 592 | 834 |
|                           | 40%w/v E-Z-Paque®    | 528 | 120 | 334 | 409 | 542 | 613 | 801 |

|                                                     |                      |      |     |      |      |      |      |      |
|-----------------------------------------------------|----------------------|------|-----|------|------|------|------|------|
| UES Diameter [% (C2-4)]                             | 20%w/v E-Z-HD™       | 18.5 | 6.5 | 8.8  | 12.8 | 18.1 | 24.2 | 29.9 |
|                                                     | 20%w/v Polibar Plus® | 20.4 | 4.1 | 10.2 | 18.6 | 20.4 | 23.2 | 26.0 |
|                                                     | 20%w/v E-Z-Paque®    | 21.4 | 5.4 | 10.8 | 16.5 | 23.5 | 25.3 | 30.6 |
|                                                     | 40%w/v Polibar Plus® | 21.2 | 4.4 | 10.2 | 17.7 | 21.9 | 24.6 | 27.3 |
|                                                     | 40%w/v E-Z-Paque®    | 23.7 | 4.9 | 13.4 | 20.5 | 24.4 | 27.1 | 33.8 |
| Pharyngeal Area at Maximum Constriction [% (C2-4)²] | 20%w/v E-Z-HD™       | 0.3  | 0.5 | 0.0  | 0.0  | 0.0  | 0.4  | 2.1  |
|                                                     | 20%w/v Polibar Plus® | 1.7  | 1.6 | 0.1  | 0.6  | 1.4  | 2.3  | 6.7  |
|                                                     | 20%w/v E-Z-Paque®    | 1.7  | 1.3 | 0.0  | 0.6  | 1.3  | 2.5  | 4.8  |
|                                                     | 40%w/v Polibar Plus® | 2.0  | 1.8 | 0.2  | 0.5  | 1.2  | 3.1  | 6.8  |
|                                                     | 40%w/v E-Z-Paque®    | 2.5  | 1.8 | 0.2  | 1.4  | 2.1  | 3.1  | 8.0  |
| Vallecular Residue [% (C2-4)²]                      | 20%w/v E-Z-HD™       | 0.1  | 0.2 | 0.0  | 0.0  | 0.0  | 0.0  | 0.7  |
|                                                     | 20%w/v Polibar Plus® | 0.2  | 0.2 | 0.0  | 0.0  | 0.3  | 0.4  | 0.5  |
|                                                     | 20%w/v E-Z-Paque®    | 0.3  | 0.4 | 0.0  | 0.1  | 0.2  | 0.4  | 1.6  |
|                                                     | 40%w/v Polibar Plus® | 0.5  | 0.4 | 0.0  | 0.1  | 0.3  | 0.8  | 1.4  |
|                                                     | 40%w/v E-Z-Paque®    | 0.4  | 0.4 | 0.0  | 0.1  | 0.3  | 0.7  | 1.4  |

|                                                              |                      |     |     |     |     |     |     |     |
|--------------------------------------------------------------|----------------------|-----|-----|-----|-----|-----|-----|-----|
| Pyriform Sinus Residue<br>[% (C2-4) <sup>2</sup> ]           | 20%w/v E-Z-HD™       | 0.0 | 0.1 | 0.0 | 0.0 | 0.0 | 0.1 | 0.2 |
|                                                              | 20%w/v Polibar Plus® | 0.1 | 0.2 | 0.0 | 0.0 | 0.0 | 0.2 | 0.7 |
|                                                              | 20%w/v E-Z-Paque®    | 0.2 | 0.3 | 0.0 | 0.0 | 0.0 | 0.3 | 1.2 |
|                                                              | 40%w/v Polibar Plus® | 0.3 | 0.4 | 0.0 | 0.0 | 0.1 | 0.3 | 1.5 |
|                                                              | 40%w/v E-Z-Paque®    | 0.4 | 0.4 | 0.0 | 0.0 | 0.2 | 0.6 | 1.4 |
| Residue Elsewhere in<br>the Pharynx [% (C2-4) <sup>2</sup> ] | 20%w/v E-Z-HD™       | 0.0 | 0.0 | 0.0 | 0.0 | 0.0 | 0.0 | 0.0 |
|                                                              | 20%w/v Polibar Plus® | 0.1 | 0.2 | 0.0 | 0.0 | 0.0 | 0.3 | 0.5 |
|                                                              | 20%w/v E-Z-Paque®    | 0.3 | 0.5 | 0.0 | 0.0 | 0.1 | 0.4 | 1.9 |
|                                                              | 40%w/v Polibar Plus® | 0.2 | 0.3 | 0.0 | 0.0 | 0.1 | 0.4 | 0.9 |
|                                                              | 40%w/v E-Z-Paque®    | 0.4 | 0.5 | 0.0 | 0.0 | 0.1 | 0.8 | 1.5 |
| Total Pharyngeal<br>Residue [% (C2-4) <sup>2</sup> ]         | 20%w/v E-Z-HD™       | 0.1 | 0.2 | 0.0 | 0.0 | 0.0 | 0.1 | 0.7 |
|                                                              | 20%w/v Polibar Plus® | 0.4 | 0.4 | 0.0 | 0.0 | 0.3 | 0.8 | 1.5 |
|                                                              | 20%w/v E-Z-Paque®    | 0.9 | 1.0 | 0.0 | 0.1 | 0.5 | 1.2 | 3.5 |
|                                                              | 40%w/v Polibar Plus® | 0.9 | 0.8 | 0.0 | 0.2 | 0.7 | 1.6 | 2.7 |
|                                                              | 40%w/v E-Z-Paque®    | 1.2 | 1.0 | 0.1 | 0.3 | 0.9 | 2.4 | 3.0 |

|                                                  |                      |       |      |       |       |       |       |       |
|--------------------------------------------------|----------------------|-------|------|-------|-------|-------|-------|-------|
| Hyoid Peak Position, X<br>Coordinate [% (C2-4)]  | 20%w/v E-Z-HD™       | 145.8 | 15.5 | 106.5 | 135.6 | 150.2 | 155.0 | 173.1 |
|                                                  | 20%w/v Polibar Plus® | 144.1 | 14.8 | 112.8 | 132.8 | 147.0 | 156.0 | 167.8 |
|                                                  | 20%w/v E-Z-Paque®    | 143.1 | 16.4 | 108.4 | 130.1 | 149.4 | 154.7 | 175.6 |
|                                                  | 40%w/v Polibar Plus® | 144.4 | 14.2 | 117.3 | 131.4 | 145.8 | 152.4 | 170.5 |
|                                                  | 40%w/v E-Z-Paque®    | 144.4 | 16.0 | 111.5 | 131.9 | 147.1 | 155.6 | 169.1 |
| Hyoid Peak Position, Y<br>Coordinate [% (C2-4)]  | 20%w/v E-Z-HD™       | 72.7  | 19.4 | 25.8  | 67.9  | 76.9  | 87.3  | 95.5  |
|                                                  | 20%w/v Polibar Plus® | 75.4  | 24.1 | 18.2  | 65.5  | 83.2  | 91.7  | 106.5 |
|                                                  | 20%w/v E-Z-Paque®    | 74.7  | 22.7 | 21.0  | 61.7  | 82.1  | 91.2  | 105.3 |
|                                                  | 40%w/v Polibar Plus® | 73.8  | 22.1 | 27.4  | 62.6  | 79.7  | 89.7  | 101.9 |
|                                                  | 40%w/v E-Z-Paque®    | 76.0  | 22.3 | 29.4  | 62.3  | 80.5  | 93.2  | 110.4 |
| Hyoid Peak Position,<br>XY Coordinate [% (C2-4)] | 20%w/v E-Z-HD™       | 164.1 | 14.5 | 131.8 | 156.0 | 165.2 | 175.8 | 185.7 |
|                                                  | 20%w/v Polibar Plus® | 164.3 | 15.1 | 132.8 | 155.4 | 167.1 | 177.0 | 189.3 |
|                                                  | 20%w/v E-Z-Paque®    | 163.1 | 14.5 | 135.6 | 151.4 | 163.0 | 176.9 | 186.1 |
|                                                  | 40%w/v Polibar Plus® | 163.7 | 13.2 | 139.9 | 153.2 | 166.6 | 174.3 | 182.3 |
|                                                  | 40%w/v E-Z-Paque®    | 164.8 | 14.1 | 139.7 | 152.8 | 166.7 | 174.2 | 190.8 |

|                               |                      |       |      |      |      |       |       |       |
|-------------------------------|----------------------|-------|------|------|------|-------|-------|-------|
| Hyoid XY Speed<br>[%(C2-4)/s] | 20%w/v E-Z-HD™       | 110.5 | 30.3 | 51.5 | 88.8 | 114.0 | 133.6 | 164.8 |
|                               | 20%w/v Polibar Plus® | 124.7 | 35.1 | 62.8 | 99.3 | 122.3 | 147.8 | 203.4 |
|                               | 20%w/v E-Z-Paque®    | 108.3 | 29.5 | 49.4 | 82.2 | 106.0 | 133.9 | 168.4 |
|                               | 40%w/v Polibar Plus® | 118.7 | 34.2 | 71.1 | 92.5 | 110.0 | 145.7 | 185.5 |
|                               | 40%w/v E-Z-Paque®    | 117.0 | 26.2 | 75.1 | 95.0 | 121.3 | 137.2 | 161.7 |

UES = Upper Esophageal Sphincter

LVC = Laryngeal Vestibule Closure
