# Supplementary material
Source: publisher figshare collection journal article supplement (https://asha.figshare.com/articles/dataset/_/20669712)
Supplement: Supplementary file 2 [file 1]

**Supplemental Material S1.** Videofluoroscopy task orders.

| <b><u>Task Number</u></b> | <b><u>Task Order A</u></b> | <b><u>Task Order B</u></b> |
|---------------------------|----------------------------|----------------------------|
| 1                         | Static Image               | Static Image               |
| 2                         | Static Image               | Static Image               |
| 3                         | Other Consistency          | Other Consistency          |
| 4                         | Other Consistency          | Other Consistency          |
| 5                         | Other Consistency          | Other Consistency          |
| 6                         | Other Consistency          | Other Consistency          |
| 7                         | Other Consistency          | Other Consistency          |
| 8                         | Other Consistency          | 20mL 20%w/v EZP            |
| 9                         | Other Consistency          | 20mL 20%w/v EZP            |
| 10                        | Other Consistency          | Other Consistency          |
| 11                        | Polibar 40%w/v             | EZHD 20%w/v                |
| 12                        | Polibar 40%w/v             | EZHD 20%w/v                |
| 13                        | Other Consistency          | Other Consistency          |
| 14                        | EZHD 20%w/v                | Polibar 40%w/v             |
| 15                        | EZHD 20%w/v                | Polibar 40%w/v             |
| 16                        | Other Consistency          | Other Consistency          |
| 17                        | EZP 20%w/v                 | Polibar 20%w/v             |
| 18                        | EZP 20%w/v                 | Polibar 20%w/v             |
| 19                        | Other Consistency          | Other Consistency          |
| 20                        | Polibar 20%w/v             | EZP 20%w/v                 |
| 21                        | Polibar 20%w/v             | EZP 20%w/v                 |
| 22                        | Other Consistency          | Other Consistency          |
| 23                        | EZP 40%w/v                 | EZP 40%w/v                 |
| 24                        | EZP 40%w/v                 | EZP 40%w/v                 |
| 25                        | Static Image               | Static Image               |
| 26                        | Static Image               | Static Image               |
| 27                        | Static Image               | Static Image               |

Shaded cells represent tasks in the larger experimental protocol that were not considered for the current analysis.
